RESEARCH ARTICLE

# Krt6a-Positive Mammary Epithelial Progenitors Are Not at Increased Vulnerability to Tumorigenesis Initiated by ErbB2

Kimberly R. Holloway<sup>1‡</sup>, Vidya C. Sinha<sup>1,2‡</sup>, Michael J. Toneff<sup>2</sup>, Wen Bu<sup>1,2</sup>, Susan G. Hilsenbeck<sup>1</sup>, Yi Li<sup>1,2,3\*</sup>

**1** Lester & Sue Smith Breast Center, Baylor College of Medicine, Houston, TX, United States of America, **2** Department of Molecular and Cellular Biology, Baylor College of Medicine, Houston, TX, United States of America, **3** Department of Molecular Virology and Microbiology, Baylor College of Medicine, Houston, TX, United States of America

‡ These authors contributed equally to this work.

\* [liy@bcm.edu](mailto:liy@bcm.edu)

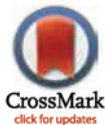

OPEN ACCESS

**Citation:** Holloway KR, Sinha VC, Toneff MJ, Bu W, Hilsenbeck SG, Li Y (2015) Krt6a-Positive Mammary Epithelial Progenitors Are Not at Increased Vulnerability to Tumorigenesis Initiated by ErbB2. *PLoS ONE* 10(1): e0117239. doi:10.1371/journal.pone.0117239

**Academic Editor:** William B. Coleman, University of North Carolina School of Medicine, UNITED STATES

**Received:** September 4, 2014

**Accepted:** December 22, 2014

**Published:** January 30, 2015

**Copyright:** © 2015 Holloway et al. This is an open access article distributed under the terms of the [Creative Commons Attribution License](http://creativecommons.org/licenses/by/4.0/), which permits unrestricted use, distribution, and reproduction in any medium, provided the original author and source are credited.

**Data Availability Statement:** All relevant data are within the paper.

**Funding:** This study was supported by National Institutes of Health (<http://www.nih.gov/>): #CA124820 (YL); # RR024574 (Cytometry and Cell Sorting Core at Baylor College of Medicine); #T32AG000183 (KRH); National Cancer Institute (<http://www.cancer.gov/>): #U54CA149196 to YL (PI Stephen Wong); #CA125123 (Cytometry and Cell Sorting Core at Baylor College of Medicine); #P30CA125123 (Duncan Cancer Center); National Institute of Allergy and Infectious Diseases (<http://www.niaid.nih.gov/>):

## Abstract

While most breast cancers are thought to arise from the luminal layer of the breast tissue, it remains unclear which specific cells in the luminal layer are the cells of origin of breast cancer. We have previously reported that WAP-positive luminal epithelial cells are at increased susceptibility to tumor initiation by ErbB2 compared to the bulk population, while the mammary cells with canonical Wnt signaling activity fail to evolve into tumors upon ErbB2 activation. Here, we used retrovirus to introduce ErbB2 into the Krt6a-positive mammary progenitor subset of the luminal epithelium and, for comparison, into the mammary luminal epithelium indiscriminately. Tumors developed from both groups of cells with a similar latency. These data indicate that the Krt6a-positive subset of mammary epithelial cells can be induced to form cancer by ErbB2 but it is not more susceptible to tumorigenesis initiated by ErbB2 than the bulk population of the luminal epithelium.

## Introduction

The breast epithelial compartment is organized like a branching tree with large ducts, ductules, and alveoli, the latter of which can produce milk during late pregnancy and lactation. These ducts and alveoli are lined with an inner layer of luminal epithelial cells and an outer layer of myoepithelial cells. Most breast cancers are thought to arise from the luminal epithelial layer [1]. Cells in this luminal epithelial layer are heterogeneous in differentiation and expression of genes important in breast development and function. For example, cells expressing CD61 (β3 integrin) are less differentiated than others, while those that produce estrogen receptor (ER) appear to be more differentiated [2,3]. Whey acidic protein (WAP) is made by a subset of differentiated luminal epithelial cells especially those that line alveoli [4] though parity may

#A1036211 (Cytometry and Cell Sorting Core at Baylor College of Medicine); Cancer Prevention Research Institute of Texas (<http://www.cpr.it.state.tx.us/>); #RP101499 (VCS). The funders had no role in study design, data collection and analysis, decision to publish, or preparation of the manuscript.

**Competing Interests:** The authors have declared that no competing interests exist. Yi Li is a PLOS ONE Editorial Board member; however, this does not alter the authors' adherence to PLOS ONE Editorial policies and criteria.

alter the fate of some of the WAP+ cells [5,6]. Recently, we have reported that a small subset of luminal epithelial cells produce cytokeratin 6a (Krt6a) and are progenitor cells [7].

It has been shown, using the MMTV promoter to express an oncogenic transgene indiscriminately in the luminal epithelial layer, that tumors arise with different latencies depending upon the oncogene [8]. However, these experiments do not provide insight regarding whether these transgenes induced tumors from a specific subset of luminal epithelial cells or not. By breeding transgenic mice expressing *ErbB2* from the MMTV promoter (MMTV-*ErbB2*) with a transgenic mouse line to express the gene encoding the Cre recombinase from the *WAP* promoter (and therefore to mark WAP+ cells), Henry et al. [9] have discovered evidence that WAP+ cells are the cell of origin of tumor initiated by the MMTV-*ErbB2* transgene, which is also supported by Jeselsohn et al. [10]. Others have reported the CD24+Sca1+ progenitor cell subset as the cell of origin for MMTV-*ErbB2*-induced tumors [11,12].

We have reported the use of the avian leukosis virus-derived retroviral vector RCAS for introducing an oncogene into selected mammary luminal epithelial cells that express the gene encoding the TVA receptor, which is normally absent in mammalian cells [13]. We have reported transgenic mice expressing *tva* from the promoter of MMTV (MMTV-*tva*) for indiscriminate infection of the luminal epithelium [13], and from the promoters of *WAP*, *TOP*, and *Krt6a* [7,14–16] for selective infection of WAP+, canonical Wnt signaling-active, and Krt6a+ cells, respectively. Using RCAS carrying a constitutively activated version of *ErbB2* (*caErbB2*) to infect WAP-*tva* mice and MMTV-*tva* mice, we have found that the WAP+ luminal cells are more susceptible to tumorigenesis initiated by *caErbB2* than the bulk population [15]. This along with the report by Henry et al. [9] strongly suggests that the WAP+ alveolar cell population is especially susceptible to tumorigenesis initiated by ErbB2. Additionally, we have found that the elevated susceptibility of these WAP+ cells to tumorigenesis is likely due to heightened levels of phosphorylated and activated STAT5 [15], which can weaken the apoptosis anticancer barrier that is normally erected by mammary cells following oncogene activation [14].

The natural corollary of the above findings is that there may be some luminal epithelial cells that are less susceptible or even resistant to transformation by ErbB2. Indeed, we have recently reported that mammary cells that are marked by transcriptional activity of the canonical Wnt signaling-responsive synthetic promoter *TOP* are “resistant” to transformation by ErbB2—they do not form tumors upon the gain of *caErbB2* and appear to have died as a result of ErbB2 activation, possibly a result of the activation of the apoptosis anticancer barrier [16]. Canonical Wnt signaling activity has been associated with mammary cells with properties of stem or progenitor cells [17,18]. Therefore, these data suggest that perhaps the less differentiated mammary cell population marked by Wnt activity may not be the cell of origin for ErbB2-initiated cancer.

To directly test whether the progenitor subset of the luminal epithelium is resistant to ErbB2-initiated tumorigenesis, we injected RCAS-*caErbB2* into both Krt6a-*tva* mice and MMTV-*tva* mice and compared their tumor latency. We report here that, unlike the *TOP-tva*-expressing population, the Krt6a population can indeed be induced by *caErbB2* to form tumors but is not more susceptible to *caErbB2*-initiated tumorigenesis than the bulk mammary epithelial population defined by MMTV. Consequently, they are less susceptible to tumorigenesis than the WAP-positive population.

## Materials and Methods

### Ethics statement

All procedures using mice were performed in compliance with Baylor College of Medicine Animal Care and Use Committee-approved animal protocol (protocol number: AN-2834).

## Transgenic mice and animal care

RCAS virus preparation and mammary intraductal infection have been previously described [1]. Animal care and procedures were approved by the Institutional Animal Care and Use Committee of Baylor College of Medicine and were in accordance with the procedures detailed in the Guide for Care and Use of Laboratory Animals (NIH publication 85–23). The BAC transgenic K6a-*tva* mouse line generation has been described previously [2]. The transgenic MMTV-*tva* mouse line generation has also been described previously [1].

## Virus preparation and delivery to the mammary gland

RCAS virus preparation has been previously described [1]. Mice were deeply anesthetized with Rodent III CCM combination anesthetic DEA-III mixture (0.05 mg/30g body weight) containing ketamine (37.5 mg/ml), xylazine (1.9 mg/ml), and acepromazine (0.37 mg/ml), administered via intraperitoneal injection. RCAS-*GFP* or RCAS-*caErbB2* (10  $\mu$ L) was delivered into the numbers 2, 3, and 4 mammary gland through intraductal injection into pubertal (5 weeks of age) K6a-*tva* mice and MMTV-*tva* mice. A tracking dye (0.1% bromophenol blue) was used to determine injection success. For RCAS-*GFP*-infected mice, the infected glands were collected for flow cytometry analysis 2.5–4 days post injection, as previously described [13]. For RCAS-*caErbB2*-infected mice, glands were monitored three times per week.

## Tissue processing and immunostaining

Prior to collection of mammary tissue, mice were euthanized via cervical disarticulation while under CO<sub>2</sub>-induced unconsciousness. Mammary tumors were removed and fixed in 4% paraformaldehyde overnight at 4°C. Fixed tissues were paraffin-embedded, and 3- $\mu$ m sections were generated. For immunofluorescent staining, deparaffinized slides were incubated with the primary antibodies overnight at 4 degrees Celsius. After three washes with Tris-buffered saline supplemented with 0.05% Tween 20 (TBST), slides were incubated with the fluorophore-conjugated secondary antibodies for 30 minutes at room temperature, washed with Tris-buffered saline supplemented with 0.05% Tween 20, and counterstained with 4', 6-diamidino-2-phenylindole (DAPI) to identify nuclei.

## Results and Discussion

### A similar rate of viral infection in Krt6a-*tva* and MMTV-*tva* mice is achieved by injecting fewer viral particles in MMTV-*tva* mice

To test whether the Krt6a+ cells are at increased or decreased susceptibility to tumorigenesis, it is essential that an oncogene is introduced into the same number of Krt6a+ cells vs. the reference cells. As in the previous studies [7,14–16] comparing the tumorigenic susceptibility of either WAP+ mammary cells or TOP+ mammary cells with the reference population defined by supporting the promoter activity of MMTV LTR, we also used the intraductal nipple injection of RCAS to introduce genes of interest into target cells. Less than 1% of the luminal cells produce TVA in Krt6a-*tva* mice, while approximately 50% of luminal mammary epithelial cells of MMTV-*tva* make TVA [7,14–16]. Intraductal injection of  $1 \times 10^7$  infectious units (IUs) of RCAS carrying the gene encoding green fluorescent protein (RCAS-*GFP*) into 5-week-old Krt6a-*tva* mice led to infection of 0.01% of mammary cells [7]. To ensure comparable rates of oncogene activation in both groups, we titrated the number of viral particles injected into age-matched MMTV-*tva* mice until we also achieved approximate 0.01% of infected cells (Fig. 1).

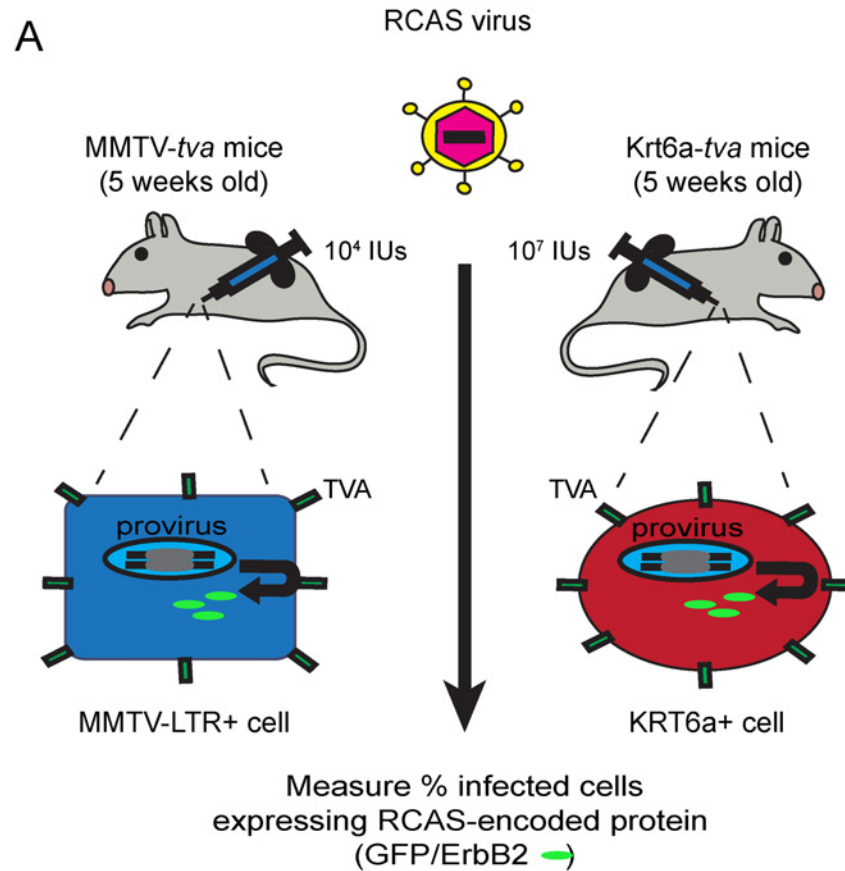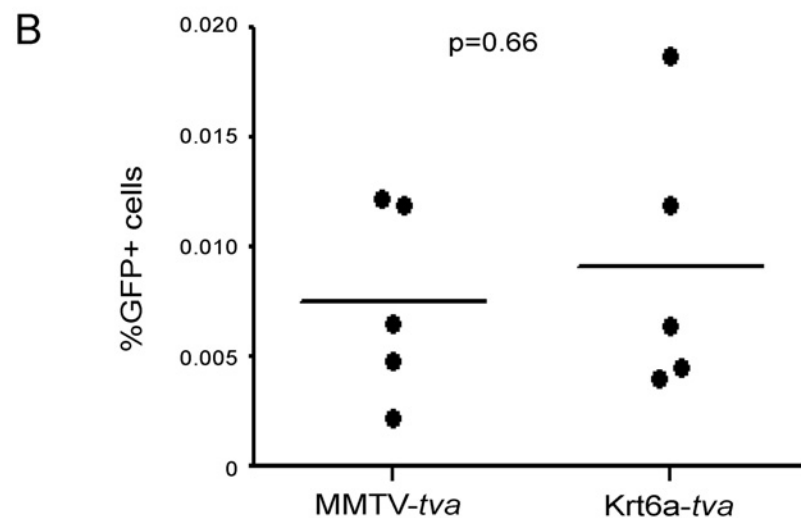

**Fig 1. Infection rates are similar between MMTV-*tva* mice and K6a-*tva* mice after viral dosage adjustment.** (A)  $10^4$  and  $10^7$  IUs of RCAS-GFP was intraductally injected into the mammary glands of MMTVA-*tva* and K6a-*tva* mice ( $n = 5$ ). Injected mammary glands were collected 2.5–4 days post-injection to quantify TVA+ cells via flow cytometry. (B) The percentage of RCAS-GFP-infected cells from K6a-*tva* mice (0.009%) was comparable with that from MMTV-*tva* (0.008%).

doi:10.1371/journal.pone.0117239.g001

## Latencies of *caErbB2*-induced tumors are similar in *Krt6a-tva* and *MMTV-tva* mice

After achieving similar rates of infection in these two lines of *tva* mice, we injected RCAS-*caErbB2* into 5-week-old *Krt6a-tva* ( $n = 25$ ,  $1 \times 10^7$  IUs) and *MMTV-tva* ( $n = 33$ ,  $1 \times 10^4$  IUs) mice and palpated the mice weekly for tumor incidence (defined as a growth  $\geq 2$ mm). In the *MMTV-tva* cohort, tumors appeared with a median latency of 260 days (Fig. 2A), similar to our previous observation in this line injected with this small number of RCAS-*caErbB2* viral particles [16] but dramatically longer than in this line injected with higher doses of this virus [14,19]. In the *Krt6a-tva* cohort, tumors appeared with a median latency of 234 days (Fig. 2A). Kaplan-Meier analysis detected no difference ( $p = 0.97$ ). Because the median time to tumor detection was long, we confirmed that the tumors were indeed induced by RCAS-*caErbB2* based on immunofluorescence staining for the HA-tag in *caErbB2* (Fig. 2B). This finding suggests that the *Krt6a* progenitor population can be induced to form cancer by *caErbB2*, but that it is not more susceptible to transformation than the bulk mammary luminal epithelium.

We previously reported that the RCAS-*caErbB2* led to tumors more rapidly in *WAP-tva* mice than in *MMTV-tva* mice [14]. This finding suggests that the *WAP*-positive luminal epithelial population is more susceptible to *caErbB2*-induced tumorigenesis than the bulk mammary epithelium. Using the susceptibility of the bulk mammary epithelium to tumor induction by *caErbB2* as a reference point, and given that *Krt6a+* cells are of equal susceptibility to (Fig. 2A) and *WAP+* cells are of greater susceptibility than the reference [14], we infer that *Krt6a+* cells are also less susceptible than *WAP+* cells to tumor induction by *caErbB2*.

## *caErbB2*-induced premalignant lesions in *Krt6a-tva* and *MMTV-tva* mice display similar levels of pSTAT5 and apoptosis

STAT5 is a transcriptional factor that is phosphorylated and activated in a subset of mammary epithelial cells, such as those that express *WAP* [20]. STAT5 activation plays a key role in suppressing apoptosis in mammary early lesions and promoting early lesion progression to cancer [14]. The levels of activated STAT5 (pSTAT5) are higher in early lesions arising from *WAP+* cells than from the bulk luminal epithelium defined by *MMTV-tva* expression, and are likely responsible for the accelerated tumorigenesis in *WAP-tva* mice compared to *MMTV-tva* mice [14]. Therefore, we hypothesized that pSTAT5 levels would also be comparable in *caErbB2*-induced early lesions from *Krt6a-tva* mice versus *MMTV-tva* mice, consistent with their comparable speeds to progress to cancer (Fig. 2A). To measure STAT5 activation in *caErbB2*-induced early lesion in *Krt6a-tva* mice vs. *MMTV-tva* mice, we used co-immunofluorescence staining for both the HA-tag of *caErbB2* and pSTAT5 to determine the percentage of pSTAT5+ cells specifically in *caErbB2+* cells in early lesions. We detected pSTAT5 in 3.18% of *caErbB2+* cells in early lesions of *Krt6a-tva* mice, a frequency comparable to the 4.56% pSTAT5+ cells detected in early lesions of *MMTV-tva* mice (Fig. 3A, B), but lower than the approximately 22% that we previously detected in early lesions of *WAP-tva* mice [14]. In accordance with this similar low frequency of pSTAT5+ cells, apoptosis was also comparable in early lesions of both *Krt6a-tva* mice and *MMTV-tva* mice (2.7% and 2.8%, respectively; Fig. 3C, D). These levels of apoptosis are similar to that detected previously in RCAS-*caErbB2*-induced early lesions in *MMTV-tva* mice [14,21] and were much higher than that in early lesions in *WAP-tva* mice [14]. Collectively, these data suggest that *Krt6+* mammary luminal epithelial cells engage the apoptosis anticancer barrier to delay the progression to cancer, in part by limiting STAT5 activation in early lesions.

In conclusion, the cells of origin for breast cancers have been difficult to identify due to a lack of single markers employable in lineage tracing experiments. As an alternative to lineage

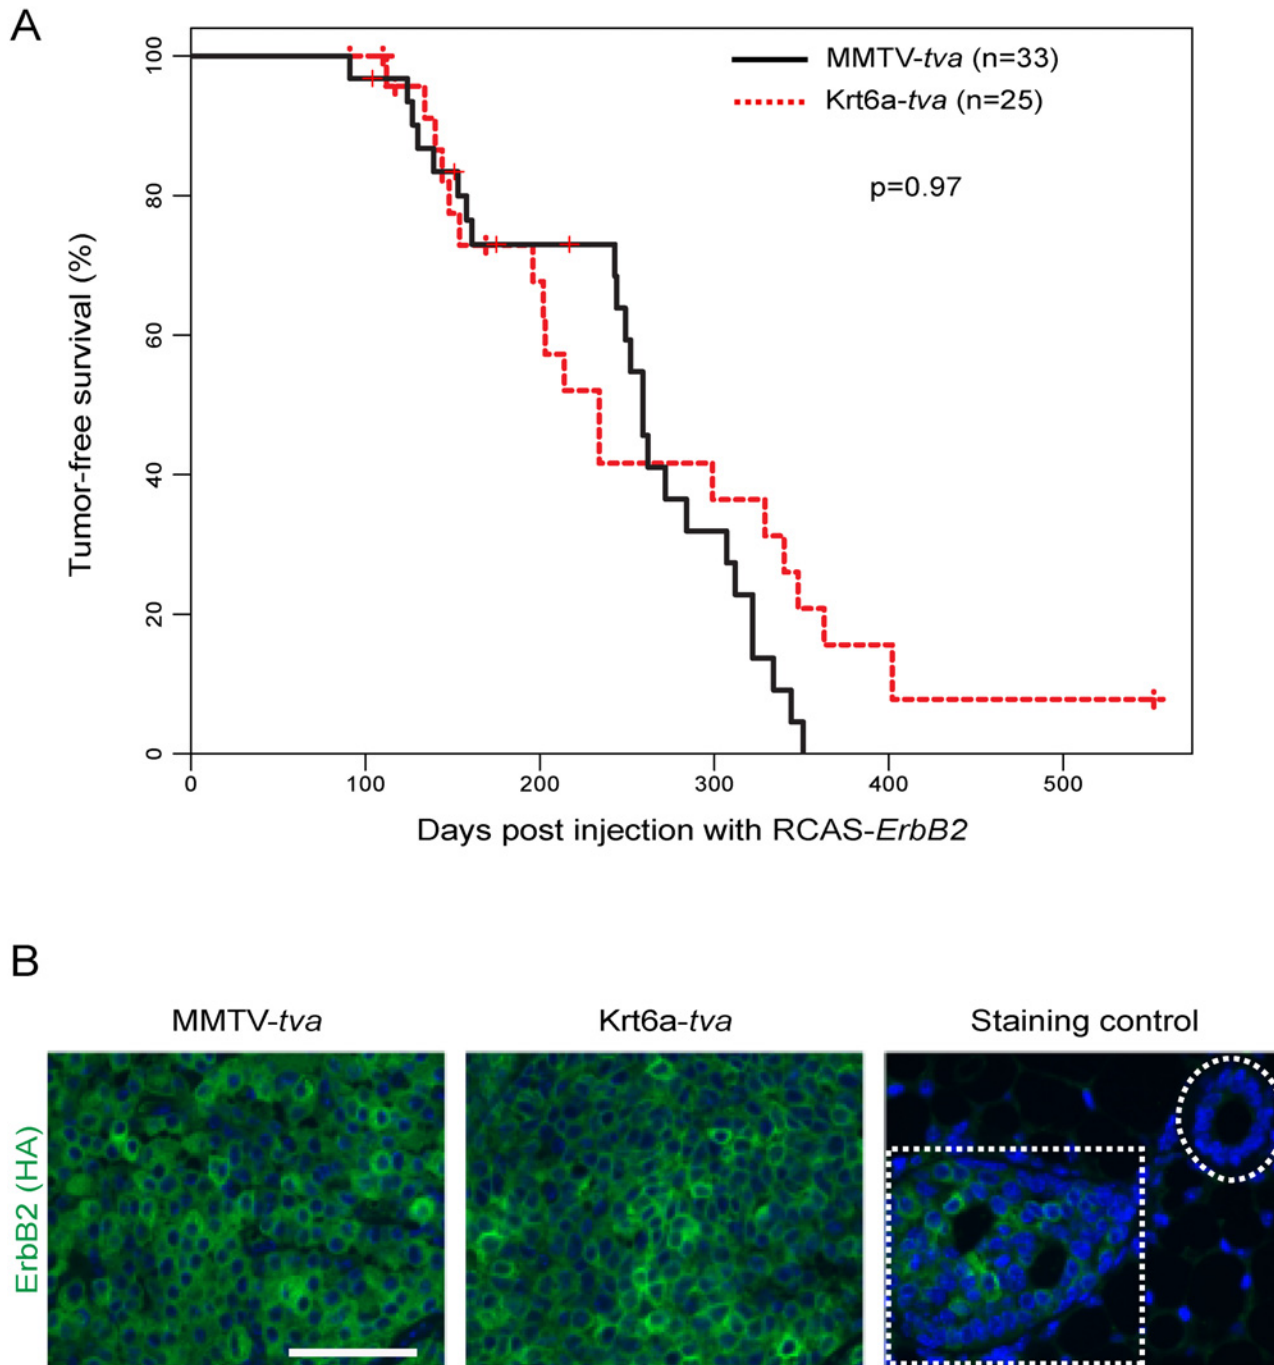

**Fig 2. ErbB2 initiated tumors with comparable latency in MMTV-*tva* and K6a-*tva* mice.** (A) Kaplan-Meier tumor-free survival curves of RCAS-*caErbB2*-infected mice of the indicated genotypes. (B) Immunofluorescent staining for HA-tagged ErbB2 in tumors from MMTV-*tva* and K6a-*tva* mice (scale bar: 50  $\mu$ m). Antibody specificity was determined by staining early lesions expressing HA-tagged ErbB2 (third panel, bottom left; positive control) and normal ducts (third panel, top right; negative control).

doi:10.1371/journal.pone.0117239.g002

tracing, we aim to identify potential cells of origin based on the susceptibility of specific mammary epithelial cell populations to transformation by particular oncogenes using the TVA model. To this end, we have generated several mouse models allowing us to target the ErbB2 oncogene into the bulk mammary epithelium, as well as specific, well-defined populations,

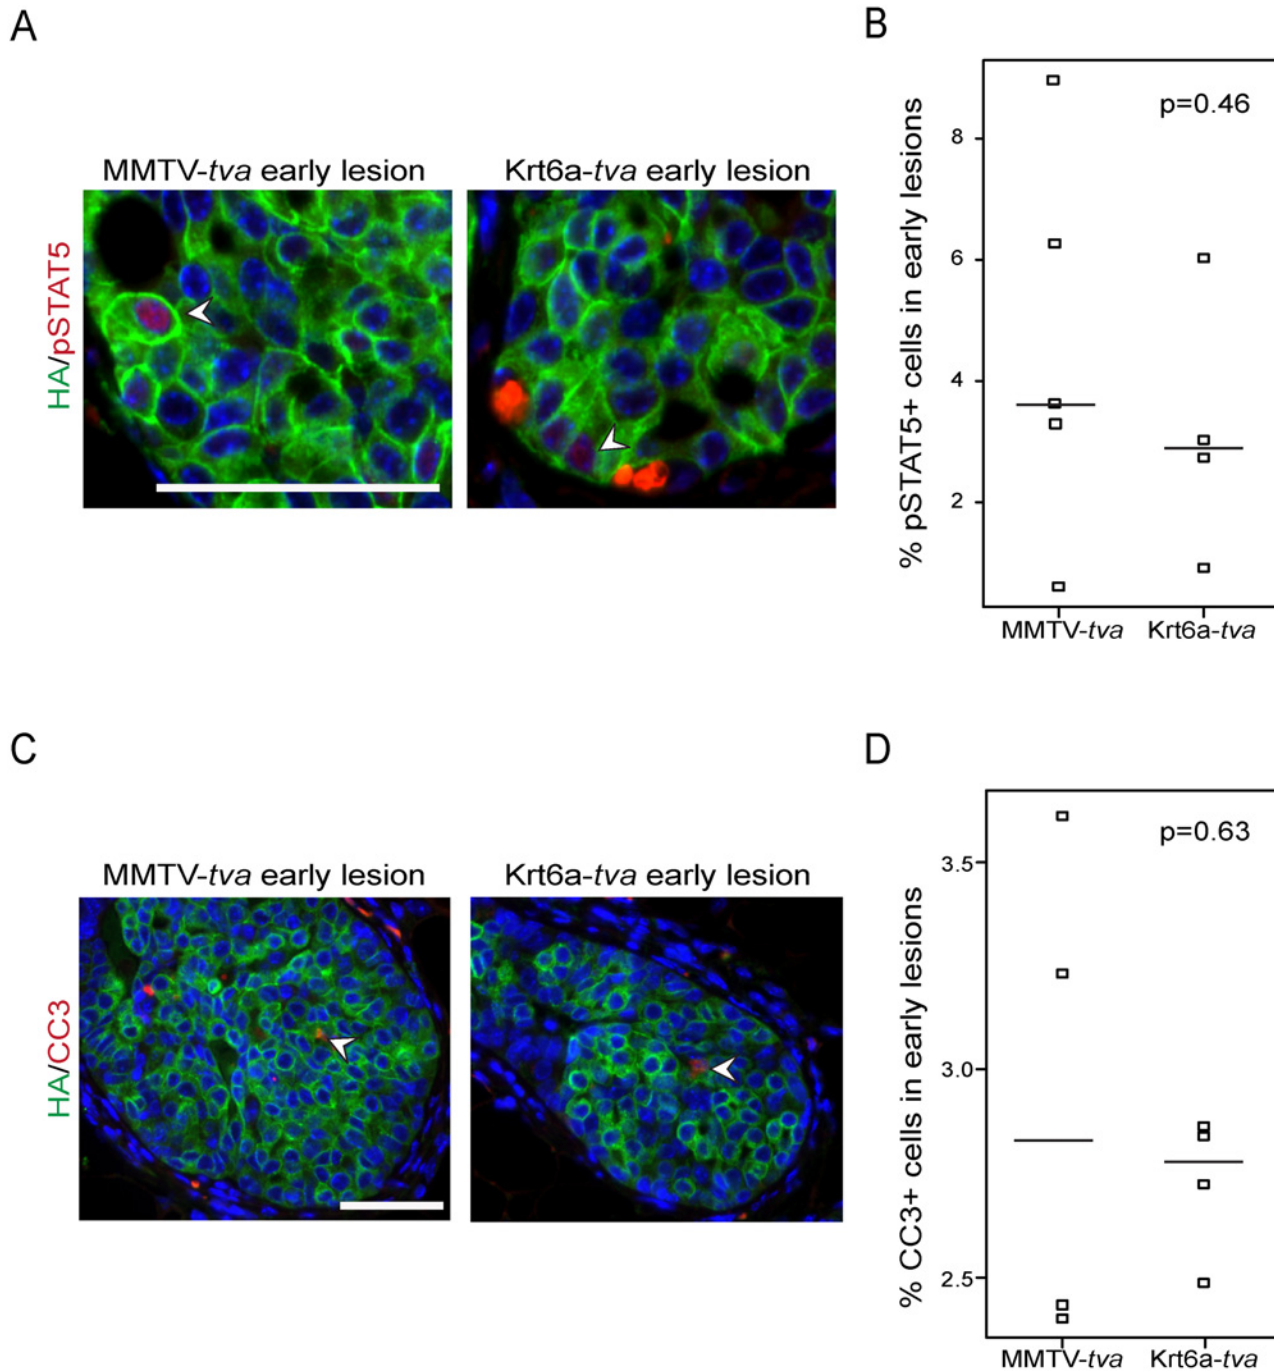

**Fig 3. ErbB2-induced premalignant lesions in MMTV-*tva* and K6a-*tva* mice exhibit similar pSTAT5 and apoptosis.** (A) Co-immunofluorescent staining for HA tagged-ErbB2 (green) and pSTAT5 (red) in tumors from MMTV-*tva* and K6a-*tva* mice, with (B) quantification. (C) Co-immunofluorescent staining for HA-tagged ErbB2 (green) and cleaved caspase 3 (red) in tumors from MMTV-*tva* and K6a-*tva* mice, with (D) quantification (scale bar: 50  $\mu$ m).

doi:10.1371/journal.pone.0117239.g003

such as the WAP+, TOP+, and Krt6a+ expressing populations. Using the MMTV model as a baseline, we are thus able to compare (albeit indirectly) the relative susceptibilities of these cell subsets to ErbB2-induced transformation. We found that Krt6a+ progenitor cells can be induced by ErbB2 activation to form tumors, but they are not more vulnerable than the bulk

luminal epithelium and appear to be less susceptible than the WAP+ cell subset, possibly due to their failed activation of the STAT5-mediated suppression of the apoptosis anticancer. These findings begin to shed light on the susceptibility of different mammary epithelial populations to ErbB2-induced tumorigenesis, and bring us closer to the identification of the cell of origin of ErbB2+ breast cancer.

## Acknowledgments

The authors thank the BCM Pathology Core and the BCM Cytometry and Cell Sorting Core for expert advice and assistance.

## Author Contributions

Conceived and designed the experiments: KRH VCS MJT WB YL. Performed the experiments: KRH VCS MJT WB. Analyzed the data: KRH VCS SGH. Contributed reagents/materials/analysis tools: YL SGH. Wrote the paper: KRH VCS YL.

## References

1. Russo J, Tay LK, Russo IH (1982) Differentiation of the mammary gland and susceptibility to carcinogenesis. *Breast Cancer Res Treat* 2: 5–73. doi: [10.1007/BF01805718](https://doi.org/10.1007/BF01805718) PMID: [6216933](https://pubmed.ncbi.nlm.nih.gov/6216933/)
2. Asselin-Labat M-L, Sutherland KD, Barker H, Thomas R, Shackleton M, et al. (2007) Gata-3 is an essential regulator of mammary-gland morphogenesis and luminal-cell differentiation. *Nat Cell Biol* 9: 201–209. doi: [10.1038/ncb1530](https://doi.org/10.1038/ncb1530) PMID: [17187062](https://pubmed.ncbi.nlm.nih.gov/17187062/)
3. Asselin-Labat M-L, Shackleton M, Stingl J, Vaillant F, Forrest NC, et al. (2006) Steroid hormone receptor status of mouse mammary stem cells. *J Natl Cancer Inst* 98: 1011–1014. doi: [10.1093/jnci/djj267](https://doi.org/10.1093/jnci/djj267) PMID: [16849684](https://pubmed.ncbi.nlm.nih.gov/16849684/)
4. Robinson GW, McKnight RA, Smith GH, Hennighausen L (1995) Mammary epithelial cells undergo secretory differentiation in cycling virgins but require pregnancy for the establishment of terminal differentiation. *Development* 121: 2079–2090. PMID: [7635053](https://pubmed.ncbi.nlm.nih.gov/7635053/)
5. Wagner K-U, Boulanger CA, Henry MD, Sgagias M, Hennighausen L, et al. (2002) An adjunct mammary epithelial cell population in parous females: its role in functional adaptation and tissue renewal. *Development* 129: 1377–1386. PMID: [11880347](https://pubmed.ncbi.nlm.nih.gov/11880347/)
6. Boulanger CA, Wagner K-U, Smith GH (2005) Parity-induced mouse mammary epithelial cells are pluripotent, self-renewing and sensitive to TGF-beta1 expression. *Oncogene* 24: 552–560. doi: [10.1038/sj.onc.1208185](https://doi.org/10.1038/sj.onc.1208185) PMID: [15580303](https://pubmed.ncbi.nlm.nih.gov/15580303/)
7. Bu W, Chen J, Morrison GD, Huang S, Creighton CJ, et al. (2011) Keratin 6a marks mammary bipotential progenitor cells that can give rise to a unique tumor model resembling human normal-like breast cancer. *Oncogene* 30: 4399–4409. doi: [10.1038/onc.2011.147](https://doi.org/10.1038/onc.2011.147) PMID: [21532625](https://pubmed.ncbi.nlm.nih.gov/21532625/)
8. Li Y, Rosen JM (2005) Stem/progenitor cells in mouse mammary gland development and breast cancer. *J Mammary Gland Biol Neoplasia* 10: 17–24. doi: [10.1007/s10911-005-2537-2](https://doi.org/10.1007/s10911-005-2537-2) PMID: [15886883](https://pubmed.ncbi.nlm.nih.gov/15886883/)
9. Henry MD, Triplett AA, Oh KB, Smith GH, Wagner K-U (2004) Parity-induced mammary epithelial cells facilitate tumorigenesis in MMTV-neu transgenic mice. *Oncogene* 23: 6980–6985. doi: [10.1038/sj.onc.1207827](https://doi.org/10.1038/sj.onc.1207827) PMID: [15286714](https://pubmed.ncbi.nlm.nih.gov/15286714/)
10. Jeselsohn R, Brown NE, Arendt L, Klebba I, Hu MG, et al. (2010) Cyclin D1 kinase activity is required for the self-renewal of mammary stem and progenitor cells that are targets of MMTV-ErbB2 tumorigenesis. *Cancer Cell* 17: 65–76. doi: [10.1016/j.ccr.2009.11.024](https://doi.org/10.1016/j.ccr.2009.11.024)
11. Li Y, Welm B, Podsypanina K, Huang S, Chamorro M, et al. (2003) Evidence that transgenes encoding components of the Wnt signaling pathway preferentially induce mammary cancers from progenitor cells. *Proc Natl Acad Sci U S A* 100: 15853–15858. doi: [10.1073/pnas.2136825100](https://doi.org/10.1073/pnas.2136825100) PMID: [14668450](https://pubmed.ncbi.nlm.nih.gov/14668450/)
12. Liu JC, Deng T, Lehal RS, Kim J, Zacksenhaus E (2007) Identification of tumorsphere- and tumor-initiating cells in HER2/Neu-induced mammary tumors. *Cancer Res* 67: 8671–8681. doi: [10.1158/0008-5472.CAN-07-1486](https://doi.org/10.1158/0008-5472.CAN-07-1486) PMID: [17875707](https://pubmed.ncbi.nlm.nih.gov/17875707/)
13. Du Z, Podsypanina K, Huang S, McGrath A, Toneff MJ, et al. (2006) Introduction of oncogenes into mammary glands in vivo with an avian retroviral vector initiates and promotes carcinogenesis in mouse models. *Proc Natl Acad Sci U S A* 103: 17396–17401. doi: [10.1073/pnas.0608607103](https://doi.org/10.1073/pnas.0608607103) PMID: [17090666](https://pubmed.ncbi.nlm.nih.gov/17090666/)



14. Haricharan S, Dong J, Hein S, Reddy JP, Du Z, et al. (2013) Mechanism and preclinical prevention of increased breast cancer risk caused by pregnancy. *Elife* 2: e00996. doi: [10.7554/eLife.00996](https://doi.org/10.7554/eLife.00996) PMID: [24381245](https://pubmed.ncbi.nlm.nih.gov/24381245/)
15. Haricharan S, Hein SM, Dong J, Toneff MJ, Aina OH, et al. (2013) Contribution of an alveolar cell of origin to the high-grade malignant phenotype of pregnancy-associated breast cancer. *Oncogene*. doi: [10.1038/onc.2013.543](https://doi.org/10.1038/onc.2013.543) PMID: [24362534](https://pubmed.ncbi.nlm.nih.gov/24362534/)
16. Bu W, Zhang X, Dai H, Huang S, Li Y (2013) Mammary cells with active Wnt signaling resist ErbB2-induced tumorigenesis. *PLoS One* 8: e78720. doi: [10.1371/journal.pone.0078720](https://doi.org/10.1371/journal.pone.0078720) PMID: [24265712](https://pubmed.ncbi.nlm.nih.gov/24265712/)
17. Lindvall C, Evans NC, Zylstra CR, Li Y, Alexander CM, et al. (2006) The Wnt signaling receptor Lrp5 is required for mammary ductal stem cell activity and Wnt1-induced tumorigenesis. *J Biol Chem* 281: 35081–35087. doi: [10.1074/jbc.M607571200](https://doi.org/10.1074/jbc.M607571200) PMID: [16973609](https://pubmed.ncbi.nlm.nih.gov/16973609/)
18. Badders NM, Goel S, Clark RJ, Klos KS, Kim S, et al. (2009) The Wnt receptor, Lrp5, is expressed by mouse mammary stem cells and is required to maintain the basal lineage. *PLoS One* 4: e6594. doi: [10.1371/journal.pone.0006594](https://doi.org/10.1371/journal.pone.0006594) PMID: [19672307](https://pubmed.ncbi.nlm.nih.gov/19672307/)
19. Toneff MJ, Du Z, Dong J, Huang J, Sinai P, et al. (2010) Somatic expression of PyMT or activated ErbB2 induces estrogen-independent mammary tumorigenesis. *Neoplasia* 12: 718–726. PMID: [20824048](https://pubmed.ncbi.nlm.nih.gov/20824048/)
20. Haricharan S, Li Y (2014) STAT signaling in mammary gland differentiation, cell survival and tumorigenesis. *Mol Cell Endocrinol* 382: 560–569. doi: [10.1016/j.mce.2013.03.014](https://doi.org/10.1016/j.mce.2013.03.014) PMID: [23541951](https://pubmed.ncbi.nlm.nih.gov/23541951/)
21. Reddy JP, Peddibhotla S, Bu W, Zhao J, Haricharan S, et al. (2010) Defining the ATM-mediated barrier to tumorigenesis in somatic mammary cells following ErbB2 activation. *Proc Natl Acad Sci U S A* 107: 3728–3733. doi: [10.1073/pnas.0910665107](https://doi.org/10.1073/pnas.0910665107) PMID: [20133707](https://pubmed.ncbi.nlm.nih.gov/20133707/)
